# Supplementary material
Source: HighWire-hosted journal article supplement (https://erj.ersjournals.com/content/54/6/1900378)
Supplement: inline-supplementary-material-3 [file inline-supplementary-material-3.pdf]

| Mice                                          | Reduction of mRNA                  |
|-----------------------------------------------|------------------------------------|
| Hif1 $\alpha^{fl/fl}$ ;UbcCreERT <sup>+</sup> | Hif1 $\alpha$ : -80% $\pm$ 5%      |
| Hif2 $\alpha^{fl/fl}$ ;UbcCreERT <sup>+</sup> | Hif2 $\alpha$ : -71% $\pm$ 6%      |
| Hif2 $\alpha^{fl/WT}$ ;UbcCreERT <sup>+</sup> | Hif2 $\alpha$ : -36% $\pm$ 4%      |
| Hif1 $\alpha$ -ASO                            | Hif1 $\alpha$ : -60% $\pm$ 5% (RV) |
| Hif2 $\alpha$ -ASO                            | Hif2 $\alpha$ : -72% $\pm$ 4%      |

**Supplementary Table 1. Hif1a and HIF2a mRNA reduction in floxed and ASO treated mice.** Rate of reduction in Hifa mRNA after hypoxia exposure (experimental setup: Fig. 1A and Fig. 3C)) in cre-positive mice and in ASO-treated animals, compared to the appropriate controls (cre-negative mice or Ctrl-ASO). Similar results were obtained for normoxic animals (data not shown). Expression was studied in lung tissue, with the exception of Hif1 $\alpha$  ASO, for which RV tissue was used (no lung tissue available). There was no reduction of Hif1 $\alpha$ , when Hif2 $\alpha$  was targeted and vice versa.

|                        | Sea Level                                 |                                           | 18,000ft                                  |                                           |
|------------------------|-------------------------------------------|-------------------------------------------|-------------------------------------------|-------------------------------------------|
|                        | Hif1 $\alpha^{fl/fl}$ ;<br><i>UbcCre-</i> | Hif1 $\alpha^{fl/fl}$ ;<br><i>UbcCre+</i> | Hif1 $\alpha^{fl/fl}$ ;<br><i>UbcCre-</i> | Hif1 $\alpha^{fl/fl}$ ;<br><i>UbcCre+</i> |
| Weight (g)             | 29.3                                      | 27.3                                      | 24.2 (**)                                 | 22.0 (**)(^)                              |
| Females /<br>Males (n) | 6/3                                       | 9/2                                       | 3/7                                       | 5/4                                       |
| Heart Rate<br>(bpm)    | 366                                       | 340                                       | 448 (***)                                 | 435 (*)                                   |
|                        |                                           |                                           |                                           |                                           |

**Supplementary Table 2.** Parameters were taken after exposure to either sea level or high altitude at the end of the experiment. \*, \*\* and \*\*\*: p<0.05, p<0.01 and p<0.001 for sea level vs. high altitude within the same genotype. ^p<0.1 for cre-negative vs. Cre-positive within the same condition. T-test was used.

|                        | Sea Level                                |                                          | 18,000ft                                 |                                          |
|------------------------|------------------------------------------|------------------------------------------|------------------------------------------|------------------------------------------|
|                        | Hif2 $\alpha^{fl/WT};$<br><i>UbcCre-</i> | Hif2 $\alpha^{fl/WT};$<br><i>UbcCre+</i> | Hif2 $\alpha^{fl/WT};$<br><i>UbcCre-</i> | Hif2 $\alpha^{fl/WT};$<br><i>UbcCre+</i> |
| Weight (g)             | 25,0                                     | 26,3                                     | 23,5                                     | 23,1                                     |
| Females /<br>Males (n) | 5/2                                      | 1/3                                      | 3/7                                      | 5/7                                      |
| Heart Rate<br>(bpm)    | 397,1                                    | 390,0                                    | 390,0                                    | 360,0                                    |
|                        |                                          |                                          |                                          |                                          |

**Supplementary Table 3.** Parameters were taken after exposure to either sea level or high altitude at the end of the experiment.

|                                | Sea Level       |                  | 18,000ft        |                  |
|--------------------------------|-----------------|------------------|-----------------|------------------|
|                                | <i>Ctrl-ASO</i> | <i>Hif2a-ASO</i> | <i>Ctrl-ASO</i> | <i>Hif2a-ASO</i> |
| <b>Weight (g)</b>              | 27,6            | 26,2             | 23,3 (**)       | 22,4 (***)(^)    |
| <b>Females /<br/>Males (n)</b> | 0/8             | 0/8              | 0/8             | 0/7              |
| <b>Heart Rate<br/>(bpm)</b>    | 386,7           | 340,5            | 500,5 (**)      | 406,4 (##)       |
|                                |                 |                  |                 |                  |

**Supplementary Table 4.** Parameters were taken after exposure to either sea level or high altitude at the end of the experiment. \*\*, \*\*\*:  $p < 0.01$  and  $p < 0.001$  for sea level vs. high altitude within the same ASO-treatment group. ^, ##:  $p < 0.1$  and  $p < 0.01$  for Ctrl-ASO vs. Hif2a-ASO within the same condition. T-test was used.

|                        | Sea Level                                 |                                           | 18,000ft                                  |                                           |
|------------------------|-------------------------------------------|-------------------------------------------|-------------------------------------------|-------------------------------------------|
|                        | Hif2 $\alpha^{fl/fl}$ ,<br><i>EC-Cre-</i> | Hif2 $\alpha^{fl/fl}$ ,<br><i>EC-Cre+</i> | Hif2 $\alpha^{fl/fl}$ ,<br><i>EC-Cre-</i> | Hif2 $\alpha^{fl/fl}$ ,<br><i>EC-Cre+</i> |
| Weight (g)             | 23,8                                      | 25,7                                      | 22,4                                      | 21,3                                      |
| Females /<br>Males (n) | 5/4                                       | 4/4                                       | 4/3                                       | 6/1                                       |

**Supplementary Table 5.** Parameters were taken after exposure to either sea level or high altitude at the end of the experiment.

| Gene   |     | Mouse                 | Rat                     | Human                       |
|--------|-----|-----------------------|-------------------------|-----------------------------|
| Acta1  | fwd | AATGCTTCTAGGCGACTCG   |                         |                             |
|        | rev | CCTGCAACCACAGCACGATT  |                         |                             |
| Adm    | fwd | GACAAAGACAAGGACGGCATG | GGTATCGGAGCATCGCTACAG   | GAG TGG AAG TGC TCC CCA CTT |
|        | rev | GCCTTGAGGGCTGATCTTGTT | GAACGGCGAGCGAACCCAAT    | CTT GTA CCA TGG GCG CCT A   |
| Apln   | fwd | GACCGAGTTGCAGCATGAATC | TGCCACTGATGCTGCCTCCA    | ATGAATCTGCGGCTCTGCGT        |
|        | rev | TCAAGGAGAGCCAGAGCAGC  | CTTCACCAGGTAGCGCATGTT   | GCGGCATCAGGGACCCTCC         |
| Arg1   | fwd | GCTTGCGAGACGTAGACCCT  | CAGAGGAGGTGACTCGTACTGTG | ACTCGAACAGTGAACACAGCAGT     |
|        | rev | TGCCAATCCCAGCTTGTCT   | ACAAGACAAGGTCAACGCCA    | CAATAGGCTTGTGATTACCCTCC     |
| Arg2   | fwd | GAAGAGGCCAAGGCAACAGC  | AGGCTGCACTCACTCGAGGT    | AATCCTCAGTTGGCCACCTC        |
|        | rev | TGTCCTCCTTCTTGTCTGACC | ATGATTGGCAGGGAGGCGAT    | CAATCACATCTACTGCCAGGTTAGC   |
| Bcl2   |     |                       |                         | TCCACCAAGAAAGCAGGAAAC       |
|        |     |                       |                         | TGGACAGGATAGCAGCACAGGA      |
| Bcl2L1 |     |                       |                         | CAG GAG AAC GGC GGC TGG GA  |
|        |     |                       |                         | TCG GCT GCT GCA TTG TTC CCA |
| Birc5  |     |                       |                         | GTGGCTGCTTCTCTCTCTCT        |
|        |     |                       |                         | GCCTTCTCCTCCCTCACTT         |

**Supplementary Table 6.** Primer sequences used for qRT-PCRs.

| Gene  |     | Mouse                       | Rat                             | Human                       |
|-------|-----|-----------------------------|---------------------------------|-----------------------------|
| Bmpr2 | fwd | AGAAGAGCACAGAGGCCCAAT       | GTC TAC ACA GTG TGA GCA TGA TGG | TGCTATGCAGAATGAACGCAAC      |
|       | rev | CTGTATACTGCTGCCATCCAGG      | CTC CAG CAG CTT CAG GTT ATC CAA | AAGGACCAATTTTGGCACACG       |
| Ca9   | fwd | TGAAGGGTCTCTGACCACACC       | CTGCCTCTCTGCTGGTGACA            | GGT GTC ATC TGG ACT GTG TTT |
|       | rev | ACACAGTCCAGATGACCCCC        | AGGAGGAAGGCGATGCTGGT            | GGT GTC AGA GAG GGT GTG GAG |
| Ccl2  | fwd |                             |                                 | CATGAAAGTCTCTGCCGCCT        |
|       | rev |                             |                                 | TGAGCGAGCCCTTGGGGAAT        |
| Ccna1 | fwd |                             | CTTCAGTACTTAAGGCGGCAA           |                             |
|       | rev |                             | GGCCAAATTCTCAGTCCTGATG          |                             |
| Ccnd1 | fwd | CGT GGC CTC TAA GATGAA GGA  | ATGGTGGCTGCTGGGAGTGT            | CGT GGC CTC TAA GATGAA GGA  |
|       | rev | GTA GAT GCA CAG CTT CTC GGC | TAGCAGGAGAGGAAGTTGTTGG          | GTA GAT GCA CAG CTT CTC GGC |
| Ccne1 | fwd |                             |                                 | GGACACCATGAAGGAGGACG        |
|       | rev |                             |                                 | TTCCTGGAGCGAGCCGAGAA        |
| Ccne2 | fwd |                             |                                 | GTAGCTGGTCTGGCGAGGTT        |
|       | rev |                             |                                 | ACGGCTACTTCGTCTTGACATTC     |
| Cd68  | fwd | CACAGGCAGCACAGTGGACA        | CTTTGGATTCAAACAGGACCG           |                             |
|       | rev | CTTGGAGCTCTCGAAGAGATGA      | GGTAGACTGTACTGTGGCTCTGATG       |                             |

**Supplementary Table 6 (continued).** Primer sequences used for RT-PCRs.

| Gene             |     | Mouse                      | Rat                             | Human                       |
|------------------|-----|----------------------------|---------------------------------|-----------------------------|
| Cxcr4            | fwd | CCCTCGCCTTCTTCCACTG        | TGTTCCAGTTCAGCACATC             | ATCTGTGACCGCTTCTACCCC       |
|                  | rev | CGAGGAAGGCATAGAGGATGG      | CCTTGGAGTGTGACAGCTTG            | AAACTGGAACACAACCACCCA       |
| Edn1             | fwd | GCACCGGAGCTGAGAATGGA       | CGAGCTGAGAAGGAAGTCAGAG          | AAAGAGTGTGTCTACTTCTGCCACC   |
|                  | rev | ACAGGAACAGCGCTTGGACC       | AAGGAGGAGCAGGAGCAACG            | CAACGTGCTCGGGAGTGTTG        |
| Epo              | fwd | TTGGAAAAGAATGGAGGTGGA      |                                 |                             |
|                  | rev | GACAGGCCTTGCCAACTTC        |                                 |                             |
| Glut1            | fwd | GGA GAG GTG TCA CCT ACA GC | GATGATGCGGGAGAAGAAGG            | TGTGGGCCTTTTCGTTAACC        |
|                  | rev | AAG GAT GCC AAC GAC GAT TC | AGCACCACGGCGATGAGGAT            | ATCATCAGCATTGAATCCGC        |
| Hif1a            | fwd | TGCAGCAAGATCTCGGCGAA       |                                 | TTT TAC CAT GCC CCA GAT TCA |
|                  | rev | AGTGGCAACTGATGAGCAAGC      |                                 | AGT GCT TCC ATC GGA AGG ACT |
| Hif2a<br>(Epas1) | fwd | GACGGAGGTCTTCTATGAGTTGG    |                                 | TACAAGGAGCCCTGCTGTC         |
|                  | rev | CGCATGATGGAGGCTTTGTC       |                                 | TGCTGGATTGGTTCACACATG       |
| Icam1            | fwd | GAGGAGATACTGAGCCGCCA       | CTTCCGACTAGGGTCCTGAA            | CTGTATACTGCTGCCATCCAGG      |
|                  | rev | GCTAGCCAGCACCGTGAATG       | CTTCAGAGGCAGGAAACAGG            | CTGGCTTCGTCAGAATCACGTT      |
| Id1              | fwd | GGTGGAGATCCTGCAGCATGTA     | TTC TGC TCT ACG ACA TGA ACG GCT | GCACCCTCAACGGCGAGATCAGCG    |
|                  | rev | CCGACTTCAGACTCCGAGTTCA     | ACA TGC TGC AGT ATC TCC ACC TTG | CAGCGACACAAGATGCGATCGTCC    |

**Supplementary Table 6 (continued).** Primer sequences used for qRT-PCRs.



| Gene   |     | Mouse                  | Rat                             | Human                           |
|--------|-----|------------------------|---------------------------------|---------------------------------|
| Id3    | fwd | GGAACGTAGCCTGGCCATT    | CTG TCG GAA CGT AGC CTA GCC ATT | CAG CGC GTC ATC GAC TAC ATT CTC |
|        | rev | TCCAAGAGGCTAAGAGGCTCC  | GCG AGT AGC AGT GGT TCA TGT CGT | CCA TCA GGG GGT CCA GGG GCT GGC |
| Myh6   | fwd | GGGCAGCTCATGCGCATTGA   |                                 |                                 |
|        | rev | TGCGCTCTTCAGCAGCGGTT   |                                 |                                 |
| Myh7   | fwd | CAGCAGTTGGATGAGCGACT   |                                 |                                 |
|        | rev | GATGCGTGCCTGAAGCTCCT   |                                 |                                 |
| Ndrgr1 | fwd | ATGCCTGGAACCCACACTGT   | GTGGAGGTGGTGACACGTA             | GAA GCA AGC ATC TCC GCA TC      |
|        | rev | AACTACCAGCCAGAGCAGGGC  | TTGTAGGCGCTGATGAACAGG           | CAA CCG GCC ACT GGT TAA TG      |
| Pai1   | fwd | TTTGGACCCAGTTCCCACC    | TTGTGAAGGAGGAACGCTGC            |                                 |
|        | rev | TGAAAGTGTTGTGCCCTCCAC  | ATTGGCTCTTGTGGCTGTCG            |                                 |
| Pdgfrb | fwd | AATGCTGAGCGACCACTCCA   | CAGCAGAGCCTGCCGTAATC            | GGCCGAGTTGGACCTGAACA            |
|        | rev | TACGGAGTCTCTGTGCAGCAGG | GAACACCTCTGTACGCGTCTTG          | TCCAGCTCGCTCCAGAGTG             |
| Pgk1   | fwd | GGAGAGTCCAGAGCGACCCCT  |                                 |                                 |
|        | rev | GCAACTTTAGCGCCTCCCA    |                                 |                                 |
| Sdf1   | fwd | ATCGGTGGCTGCGAGCTGAA   | TGTGCATTGACCCGAAATTA            | AGA TTG TAG CCC GGC TGA AG      |
|        | rev | ACATGCCTGGGATGCTGCGT   | TCCTCAGGGGTCTACTGGAA            | TCG GGT CAA TGC ACA CTT GT      |

**Supplementary Table 6 (continued).** Primer sequences used for qRT-PCRs.

| Gene                  |     | Mouse                                                 | Rat                      | Human                       |
|-----------------------|-----|-------------------------------------------------------|--------------------------|-----------------------------|
| Tgfa                  | fwd | GGGAAGGAAATGTGTTCCCTG                                 | CAACAAGTGCCCAGATTCCC     | GAAGGGAAGAACCGCTTGCT        |
|                       | rev | GGCTCAATGGGTCAGAGCAT                                  | GGCTTCTCTTCTGCACCAA      | TGGGCTCTTCAGACCACTGTT       |
| Tnc                   | fwd |                                                       | TGCTGAAGGTTGTGGCTGTG     |                             |
|                       | rev |                                                       | ATTCAGGCTCAGAGCAGTTGG    |                             |
| Tsp1                  | fwd | CAATTTTCAGGGGGTGCTGC                                  | ACATCTGCTCTGTACCTGTGG    | CCTGTGATGATGACGATGA         |
|                       | rev | CCGTTCCACCAGTTGTTGTC                                  | GGGTTGTTGCAGAGTCGGCT     | CTGATCTGGGTTGTGGTTGTA       |
| Vegf                  | fwd | TGACAAGCCAAGCGCGTGAG                                  | GGGATCTTTCATCGGACCAGT    | TGT GCC CAC TGA GGA GTC C   |
|                       | rev | CTCCTCTTCCTTCATGTCAG                                  | CGGTGTCTGTCTGTCTGTCCGT   | GGT TTG ATC CGC ATA ATC TGC |
|                       |     |                                                       |                          |                             |
| <b>House keeping:</b> |     |                                                       |                          |                             |
| 18S                   | fwd | GAA TTC CCA GTA AGT GCG GG (for mouse, rat and human) |                          |                             |
|                       | rev | GGG CAG GGA CTT AAT CAA CG (for mouse, rat and human) |                          |                             |
| Actb                  | fwd | GCCCTGAGGCTCTTTCCAG                                   | CCAGCCATGTACGTAGCCATCCAG | GCCCTGAGGCACTCTTCCA         |
|                       | rev | TGCCACAGGATTCCATACCC                                  | TCACAATGCCAGTGGTACGACCAG | ATGCCACAGGACTCCATGC         |

**Supplementary Table 6. Forward and Reverse sequences of qPCR primers used in the manuscript, listed in mouse, rat, and human genes.** The amplicon sizes are typically 50-80 mer and without significant secondary structures. All primer sets were validated by melt curve analysis, cloning and sequencing of qPCR products, and standard dilution assay to ensure specific PCR products and to have amplification efficiencies between 90% and 110%. *Hif1α* floxed mice and *Hif-2α* floxed mice were constructed wherein exon 2 (coding DNA binding domain) of the *Hif1α* or *Hif2α* gene was floxed with LoxP sites. To assess HIF1a and HIF2a deletion in HIF flox mice, qPCR primers for mouse HIF1a and HIF2a mRNAs are located in the exon 2 of HIF1α or HIF2α gene.

|                                                                                           | Gene  | Cell type | Normoxia  | Hypoxia           |
|-------------------------------------------------------------------------------------------|-------|-----------|-----------|-------------------|
| Hypoxic induction of classical HIF target genes In normal pulmonary artery vascular cells | ADM   | EC        | 100%±9.7  | 250.7%±24.3***    |
|                                                                                           |       | Fib       | 100%±0.6  | 221.3%±41.2***    |
|                                                                                           |       | SMC       | 100%±22.3 | 93.7%±6.8         |
|                                                                                           | CA9   | EC        | 100%±10.1 | 1328.6%±274.4*    |
|                                                                                           |       | Fib       | 100%±18.6 | 19164.2%±3575.7** |
|                                                                                           |       | SMC       | 100%±26.7 | 235.1%±26.7       |
|                                                                                           | GLUT1 | EC        | 100%±27   | 301.3%±33***      |
|                                                                                           |       | Fib       | 100%±1.6  | 477.0%±8.7***     |
|                                                                                           |       | SMC       | 100%±20.2 | 461.7±140.2***    |
|                                                                                           | NDRG1 | EC        | 100%±8.6  | 301.8%±15.6***    |
|                                                                                           |       | Fib       | 100%±8.7  | 333.5%±30.3***    |
|                                                                                           |       | SMC       | 100%±9.6  | 312.6%±13.6***    |
|                                                                                           | VEGF  | EC        | 100%±8.2  | 193.5%±6.9***     |
|                                                                                           |       | Fib       | 100%±5.3  | 208.5%±27.1***    |
|                                                                                           |       | SMC       | 100%±7.2  | 209.6%±30***      |
| Hypoxic induction Of inflammatory genes in normal pulmonary artery vascular cells         | CXCR4 | EC        | 100%±4.8  | 250.0%±13.2***    |
|                                                                                           |       | Fib       | 100%±2.9  | 46.3%±23.9        |
|                                                                                           |       | SMC       | 100%±3.3  | 195.6%±18.2***    |
|                                                                                           | SDF1  | EC        | 100%±13.9 | 321.5%±13.9***    |
|                                                                                           |       | Fib       | 100%±0.61 | 123.2%±53.0       |
|                                                                                           |       | SMC       | 100%±3.3  | 109.4%±32.42      |
|                                                                                           | ICAM1 | EC        | 100%±23.6 | 307.4%±18.8***    |
|                                                                                           |       | Fib       | 100%±3.7  | 138.6%±4.4        |
|                                                                                           |       | SMC       | 100%±41.6 | 162.7%±18.8       |

**Supplementary Table 7.** Gene expression in pulmonary artery cells by qRT-PCR, as in Fig. 6. Statistical significance as determined by t-test.

|                                                                                              | Gene  | Cell type | Normoxia  | Hypoxia        |
|----------------------------------------------------------------------------------------------|-------|-----------|-----------|----------------|
| Hypoxic induction<br>Of<br>signaling factors<br>in normal<br>pulmonary artery vascular cells | APLN  | EC        | 100%±12.0 | 208.3%±57.7*** |
|                                                                                              |       | Fib       | 100%±52.7 | 595.8%±64.5*** |
|                                                                                              |       | SMC       | 100%±4.3  | 530.%±16.4***  |
|                                                                                              | ARG1  | EC        | 100%±30.8 | 89.4%±15.4     |
|                                                                                              |       | Fib       | 100%±21.3 | 89.8%±32.3     |
|                                                                                              |       | SMC       | 100%±39.8 | 82.7%±4.9      |
|                                                                                              | ARG2  | EC        | 100%±22.4 | 97.9%±11.2     |
|                                                                                              |       | Fib       | 100%±15.5 | 79.0%±10.1     |
|                                                                                              |       | SMC       | 100%±8.7  | 87.2%±27.3     |
|                                                                                              | BMPR2 | EC        | 100%±16.5 | 94.7%±17.1     |
|                                                                                              |       | Fib       | 100%±25.1 | 127.8%±15.4    |
|                                                                                              |       | SMC       | 100%±27.0 | 76.6%±15.0     |
|                                                                                              | CCND1 | EC        | 100%±5.1  | 103%±6.1       |
|                                                                                              |       | Fib       | 100%±9.6  | 90%±5.8        |
|                                                                                              |       | SMC       | 100%±30.8 | 110%±32.7      |
|                                                                                              | EDN1  | EC        | 100%±13.1 | 118.0%±22.7    |
|                                                                                              |       | Fib       | 100%±38.3 | 366.5%±17.4*** |
|                                                                                              |       | SMC       | 100%±25.0 | 144.7%±8.9***  |
|                                                                                              | ID1   | EC        | 100%±14.7 | 30.0%±4.3***   |
|                                                                                              |       | Fib       | 100%±12.3 | 83.6%±12.3     |
|                                                                                              |       | SMC       | 100%±14.4 | 96%±7.1        |
|                                                                                              | ID3   | EC        | 100%±4.6  | 54.8%±12.0***  |
|                                                                                              |       | Fib       | 100%±4.3  | 96.4%±6.0      |
|                                                                                              |       | SMC       | 100%±10.0 | 91.2%±1.2      |

Supplementary Table 7, continued.

|                                                                                                             | Gene  | Cell type | Normoxia  | Hypoxia         |
|-------------------------------------------------------------------------------------------------------------|-------|-----------|-----------|-----------------|
| Hypoxic induction<br>Of<br>signaling factors<br>in normal<br>pulmonary artery vascular cells<br>(continued) | PDGFB | EC        | 100%±25.7 | 161.2%±23.3*    |
|                                                                                                             |       | Fib       | 100%±33.5 | 120.1%±12.0     |
|                                                                                                             |       | SMC       | 100%±43.2 | 257.3%±39.6**   |
|                                                                                                             | TGFA  | EC        | 100%±17.8 | 775.3%±127.1*** |
|                                                                                                             |       | Fib       | 100%±23.0 | 80%±15.0        |
|                                                                                                             |       | SMC       | 100%±60.0 | 346.9%±16.9***  |
|                                                                                                             | TSP1  | EC        | 100%±20.1 | 104.0%±4.6      |
|                                                                                                             |       | Fib       | 100%±8.1  | 141.7%±28.1     |
|                                                                                                             |       | SMC       | 100%±30.0 | 159.9%±62.5*    |

**Supplementary Table 7, continued.**

|                                                       | Gene  |              | Normoxia    | Hypoxia         | Δ                    |
|-------------------------------------------------------|-------|--------------|-------------|-----------------|----------------------|
| Hypoxic induction of classical HIF target genes in EC | GLUT1 | DMSO         | 100.0%±1.2  | 721.26%±75.1*** |                      |
|                                                       |       | PT2567 0.1μM | 103.0%±13.3 | 555.5%±20.8***  | 23% <sup>#</sup>     |
|                                                       |       | PT2567 1μM   | 88.9%±14.62 | 346.8%±21.2**   | 36.5% <sup>###</sup> |
|                                                       |       | PT2567 10μM  | 116.7%±19.6 | 242.6%±84.4*    | 51.9% <sup>###</sup> |
|                                                       | NDRG1 | DMSO         | 100.0%±12.6 | 603.3%±39.7***  |                      |
|                                                       |       | PT2567 0.1μM | 94.5%±21.7  | 578.3%±23.9***  | 4,10%                |
|                                                       |       | PT2567 1μM   | 96.2%±13.2  | 400.0%±57.8***  | 33.7% <sup>##</sup>  |
|                                                       |       | PT2567 10μM  | 99.4%±8.1   | 522.4%±7.0***   | 13.4% <sup>#</sup>   |
|                                                       | VEGF  | DMSO         | 100.0%±30.9 | 516.0%±87.8***  |                      |
|                                                       |       | PT2567 0.1μM | 97.1%±20.6  | 384.4%±50.4***  | 25.5% <sup>#</sup>   |
|                                                       |       | PT2567 1μM   | 114.8%±18.0 | 271.0%±54.0**   | 47.5% <sup>###</sup> |
|                                                       |       | PT2567 10μM  | 92.6%±20.9  | 276.0%±33.6**   | 46.5% <sup>###</sup> |
| Hypoxic induction of inflammatory genes in EC         | CXCR4 | DMSO         | 100.0%±15.0 | 350.0%±31.9**   |                      |
|                                                       |       | PT2567 0.1μM | 127.9%±26.3 | 319.3%±73.3**   | 8,77%                |
|                                                       |       | PT2567 1μM   | 79.9%±1.01  | 85.9%±11.05     | 75.5% <sup>##</sup>  |
|                                                       |       | PT2567 10μM  | 110.5%±18.0 | 98.2%±26.7      | 71.9% <sup>##</sup>  |
|                                                       | ICAM1 | DMSO         | 100.0%±33.1 | 450.8%±41.8**   |                      |
|                                                       |       | PT2567 0.1μM | 109.5%±60.0 | 105.6%±51.1     | 76.6% <sup>##</sup>  |
|                                                       |       | PT2567 1μM   | 116.9%±35.4 | 115.9%±10.2     | 74.3% <sup>##</sup>  |
|                                                       |       | PT2567 10μM  | 122.8%±15.5 | 143.2%±19.2     | 68.2% <sup>##</sup>  |
|                                                       | SDF1  | DMSO         | 100.0%±23.6 | 395.8%±18.3**   |                      |
|                                                       |       | PT2567 0.1μM | 184.6%±10.3 | 424.6%±1.02**   | 107,30%              |
|                                                       |       | PT2567 1μM   | 59.0%±31.3  | 45.5%±133.3     | 88.5% <sup>###</sup> |
|                                                       |       | PT2567 10μM  | 99.1%±28.4  | 115.5%±4.74     | 70.8% <sup>###</sup> |

**Supplementary Table 8.** Gene expression in EC by qRT-PCR, as in Fig. 7. Δ (inhibitory rate) refers how effective of HIF2 inhibitor PT2567 in reducing the induction of the gene by the hypoxia. Statistical significance as determined by t-test.

|                                                       | Gene |              | Normoxia     | Hypoxia        | Δ                     |
|-------------------------------------------------------|------|--------------|--------------|----------------|-----------------------|
| Hypoxic induction<br>of<br>signaling factors<br>in EC | ID1  | DMSO         | 100.0%±25.0  | 30.1%±4.3**    |                       |
|                                                       |      | PT2567 0.1μM | 107.5%±24.3  | 48.5%±10.1*    | 161,00%               |
|                                                       |      | PT2567 1μM   | 134.5%±35.4  | 63.0%±3.3***   | 209.3% <sup>##</sup>  |
|                                                       |      | PT2567 10μM  | 82.9%±0.53   | 69.4%±8.2      | 230.6% <sup>##</sup>  |
|                                                       | ID3  | DMSO         | 100.0%±4.6   | 57.8%±10.7**   |                       |
|                                                       |      | PT2567 0.1μM | 77.7%±31.2   | 63.7%±20.2     | 110,20%               |
|                                                       |      | PT2567 1μM   | 89.4%±25.5   | 74.2%±12.6     | 128,40%               |
|                                                       |      | PT2567 10μM  | 71.9%±10.05  | 77.3%±5.95     | 124,40%               |
|                                                       | TGFA | DMSO         | 100.0%±46.4  | 384.7%±64.9*** |                       |
|                                                       |      | PT2567 0.1μM | 139.2%±22.04 | 180.7%±5.8***  | 53.02% <sup>###</sup> |
|                                                       |      | PT2567 1μM   | 147.6%±78.6  | 134.7%±3.1     | 65% <sup>###</sup>    |
|                                                       |      | PT2567 10μM  | 185.5%±158.8 | 140.4%±10.5    | 63.5% <sup>###</sup>  |

Supplementary Table 8, continued.
